1                   **Exposure to hypomethylating agent 5-aza-2'-deoxycytidine**  
2                   **(decitabine) causes rapid, severe DNA damage, telomere elongation**  
3                   **and mitotic dysfunction in human WIL2-NS cells**

4  
5                   Caroline Bull<sup>1,2\*</sup>, Graham Mayrhofer<sup>2†</sup>, and Michael Fenech<sup>1</sup>

6                                   (1) CSIRO Health & Biosecurity,

7                                   Gate 13 Kintore Avenue, Adelaide, South Australia

8                                   (2) School of Molecular and Biomedical Sciences,

9                                   University of Adelaide, North Terrace, Adelaide, South Australia

10                                   (†) Deceased October, 2016

11  
12                   \*Address for correspondence and reprints

13                   Dr Caroline Bull

14                   CSIRO Health & Biosecurity

15                   PO Box 10041

16                   Adelaide BC, South Australia

17                   Australia 5000

18                   Email: [caroline.bull@csiro.au](mailto:caroline.bull@csiro.au)

19                   Ph: 61 8 8303 8931

20                   Fax: 61 8 8303 8899

21  
22                   **Keywords:** 5-aza-2'-deoxycytidine (5azadC), decitabine, myelodysplastic syndromes, DNA  
23                   methylation, CBMN-cytome assay, micronuclei, fused nuclei

24                   **Running title:** 5azadC induces telomere elongation and DNA damage (48 characters)

## 25 **Abstract**

26 **Background:** 5-aza-2'-deoxycytidine (5azadC, decitabine) is a DNA hypomethylating  
27 agent used in the treatment of myelodysplastic syndromes. Due to cytotoxic side effects dose  
28 optimization is essential. This study defines and quantifies the effects of 5azadC on  
29 chromosomal stability and telomere length, at clinically relevant dosages.

30 **Methods:** Human WIL2-NS cells were maintained in complete medium containing 0, 0.2  
31 or 1.0 $\mu$ M 5azadC for four days, and analysed daily for telomere length (flow cytometry),  
32 chromosomal stability (cytokinesis-block micronucleus cytome (CBMN-cyt) assay), and  
33 global methylation (%5me-C).

34 **Results:** DNA methylation decreased significantly in 1.0  $\mu$ M 5azadC, relative to control  
35 ( $p < 0.0001$ ). Exposure to 1.0 $\mu$ M 5azadC resulted in 170% increase in telomere length  
36 ( $p < 0.0001$ ), in parallel with rapid increase in biomarkers of DNA damage; (micronuclei (MN,  
37 6-fold increase), nucleoplasmic bridges (NPB, a 12-fold increase), and nuclear buds (NBud, a  
38 13-fold increase) (all  $p < 0.0001$ ). Fused nuclei (FUS), indicative of mitotic dysfunction,  
39 showed a 5- and 13-fold increase in the 0.2 $\mu$ M and 1.0 $\mu$ M conditions, respectively ( $p =$   
40 0.001) after 4 days.

41 **Conclusions:** These data show that (i) clinically relevant concentrations of 5azadC are  
42 highly genotoxic; (ii) hypomethylation was associated with increased TL and DNA damage;  
43 and (iii) longer TL was associated with chromosomal instability. These findings suggest that  
44 lower doses of 5azdC may be effective as a hypomethylating agent, while potentially  
45 reducing DNA damage and risk for secondary disease.

46

## 48 **Introduction**

49 DNA methylation is essential for gene transcription control, possibly evolving from the need  
50 to silence genes of parasitic or viral origin (1). Dysregulation of the epigenome is associated  
51 with neoplastic changes and tumorigenesis (1, 2). Hypermethylation contributes to the  
52 aetiology, and a worsening of clinical symptoms in myelodysplastic syndromes (MDS) and  
53 acute myeloid leukemia (AML). A bone marrow stem cell transplant offers the greatest  
54 chance of cure, but this is not a viable option for many patients, particularly the elderly. In  
55 some cases hypomethylating drugs such as 5-azacytidine and decitabine (5-aza-2'-  
56 deoxycytidine (5azadC)), used alone or in combination with other chemotherapeutics, can  
57 extend survival time and improve quality of life (3). These regimens are, however, highly  
58 cytotoxic and can lead to severe (acute) side effects. DNA damage resulting from treatment  
59 can also cause longer term effects such as impaired immune function and development of  
60 secondary cancers (3, 4). It is essential to optimize treatment protocols to maximise efficacy,  
61 while minimizing genotoxic side effects, and secondary health impact.

62  
63 5azadC is an analogue of the pyrimidine nucleoside cytidine, in which the carbon at position  
64 5 is replaced with nitrogen. It has been used therapeutically for the treatment of all MDS  
65 subtypes since FDA approval in 2004 (3-5). 5azadC binds irreversibly (covalently) with  
66 DNA methyltransferase 1 (DNMT1), resulting in (i) adduct formation within the DNA  
67 sequence which potentially obstructs DNA synthesis, and (ii) inhibition of DNMT1 from  
68 catalysing further methylation reactions. The hypomethylating effect becomes more  
69 pronounced after several cell divisions, as numbers of free DNMT1 molecules are gradually  
70 depleted (6). The net effect is to reduce/reverse the degree of DNA methylation, thus  
71 reactivating aberrantly silenced genes, such as tumor suppressors (6). A review of decitabine  
72 dosage protocols for MDS patients showed a range from 15-500 mg/m<sup>2</sup> infused over 1-6

73 hours, with some as long as 120 hours. Resulting plasma concentrations ranged from 0.12 –  
74 5.6  $\mu\text{M}$  (4). In a cohort of patients taking oral decitabine (in combination with  
75 tetrahydrouridine (THU)) a >75% reduction in DNMT1 in peripheral blood mononuclear  
76 cells (PBMC) was recorded, in parallel with (LINE-1) CpG methylation reduction of  
77 approximately 10% (5).

78

79 Previous studies to determine the degree of cytotoxicity and DNA damage caused by 5azadC  
80 have measured the extent to which H2AX, a key ‘first responder’ in a DNA breakage damage  
81 response, is phosphorylated to generate  $\gamma\text{H2AX}$  (7). While informative, this method is  
82 specific to DNA breaks and does not capture the different forms of chromosomal instability  
83 induced by hypomethylation and DNA replication stress. The cytokinesis-block  
84 micronucleus cytome (CBMN-cyt) assay is a comprehensive, robust diagnostic tool for  
85 detecting and quantifying several chromosomal instability events such as micronuclei,  
86 nucleoplasmic bridges and nuclear buds. The micronucleus (MN), has been internationally  
87 validated as a risk marker for cancer risk and cardiovascular disease mortality (8). To our  
88 knowledge the impact of 5azadC has not previously been studied using the CBMN cytome  
89 assay. However a previous study showed that 5azadC can induce MN due to malsegregation  
90 and loss of chromosomes 1, 9, 15, 16 and Y (9). Furthermore, an additional measure was  
91 examined in the present study, examining frequencies of the novel biomarker FUSED nuclei  
92 (FUS). FUS are indicative of failed chromatid separation, or telomere end fusions, and are  
93 known to be sensitive to changes in methylation status (10).

94

95 An additional biomarker for examining genome stability, and disease risk, is telomere length  
96 (TL). Telomeres are complex nucleoprotein structures that cap chromosome ends, protecting  
97 the coding gene region from degradation during cell division (11). Comprised of a hexamer

98 repeat sequence which lacks CpGs (TTAGGG<sub>n</sub>), telomeric DNA has no substrate for DNMT  
99 enzymes, and as such are unmethylated. The impact of changes to methylation status on  
100 telomeres varies, with conflicting results reported depending on cell type. Several studies  
101 have shown that TL increases under hypomethylating conditions (12-14), with evidence  
102 suggesting this effect is mediated through changes at the subtelomere, a heavily methylated  
103 region located between the telomere and coding DNA (14). As increased risk for many  
104 cancers has now been associated with longer TL (15-20), it is not appropriate to conclude that  
105 telomere elongation is intrinsically healthier, or provides greater stability. Ideally TL  
106 measures should be conducted in parallel with measures of chromosomal stability to  
107 distinguish between telomere lengthening that promotes chromosomal stability from that  
108 which does not. Our own previous findings have shown that longer telomeres induced under  
109 hypomethylating conditions are dysfunctional, and associated with increased chromosomal  
110 instability and DNA damage (10, 13).

111

112 The aim of the current study was to examine the hypothesis that exposure to 5azadC, within a  
113 clinically relevant range, would cause an increase in both chromosomal instability, and  
114 telomere length (TL). A key aim was to define and quantify the types of DNA damage  
115 induced. To test this, human WIL2-NS cells were cultured in the presence of 0, 0.2 or 1.0  
116  $\mu\text{M}$  5azadC for 4 days. Samples were analysed daily for growth (nuclear division index),  
117 viability, telomere length, DNA methylation status, and a panel of biomarkers of DNA  
118 damage using the CBMN-cyt assay.

119

## 121 **Materials and Methods**

### 122 **Study Design**

123 Human WIL2-NS (B lymphoblastoid) cells (American Type Culture Collection (ATCC); CRL-  
124 8155) were maintained in culture for 4 days, in complete medium containing 0, 0.2 or 1.0  $\mu\text{M}$   
125 5azadC. Cells were sampled daily and assessed for growth and viability, telomere length (TL) by  
126 flow cytometry, global methylation status (ELISA), chromosomal instability and DNA damage  
127 (cytokinesis block micronucleus cytome (CBMN-Cyt) assay). WIL2-NS was selected as an ideal  
128 (and proven) model to examine DNA damage events. The p53-deficient status of the cells allows  
129 for observation of substantial genome damage events without excessive cell death through  
130 apoptosis.

131

### 132 **Cell culture**

133 Medium was prepared using RPMI 1640 (Sigma R0883), supplemented with 5% foetal bovine  
134 serum (FBS) (Thermo, Australia), 1% penicillin/streptomycin (Sigma P4458) and 1% L-  
135 Glutamine (Sigma G7513). 5azadC (5 mg in powder form, Sigma A3656) was dissolved in 1 mL  
136 1x phosphate buffered saline (PBS) to form a 5 mg/mL stock solution with a final concentration  
137 of 21.9 mM, sterilised by filtration, and stored in aliquots at  $-20^{\circ}\text{C}$ . Pilot studies were conducted  
138 with cells cultured in CM containing 5azadC within a clinically relevant range; 0.2, 1, 5 and 10  
139  $\mu\text{M}$ . Results showed 0.2 and 1.0  $\mu\text{M}$  were optimal concentrations for maintaining a  
140 growth/survival rate sufficient to perform experimental assays up to four days. This timeframe  
141 was selected based on previous studies which had shown this to be sufficient to produce large  
142 reductions in global DNA methylation, as well as the development of micronuclei (21-23).  
143 WIL2-NS cells were thawed from liquid nitrogen storage, washed twice in PBS and grown in  
144 complete medium (CM) for seven days at  $37^{\circ}\text{C}$  in a humidified atmosphere with 5%  $\text{CO}_2$ . Cells  
145 were split into the three different 5azadC conditions (day 0 time point), and cultured for a further

146 4 days. Cultures were maintained at 90 mL volume in a 75 cm<sup>2</sup> vented-cap culture flask (Becton  
147 Dickinson, Australia). Duplicate flasks were established at day 0 to cater specifically for each  
148 sample day (days 1, 2, 3 and 4), totalling eight flasks per condition. Initial seeding concentration  
149 of each pair of flasks was adjusted, based on pilot growth data, to ensure the required numbers of  
150 viable cells at each sample point, while minimising overcrowding, nutrient depletion and pH  
151 imbalance. Each day, two flasks were removed for analysis, leaving the remaining flasks  
152 undisturbed until their respective sample day.

153

## 154 **Measurement of telomere length (TL)**

155 Telomere length (TL) was measured in cells at G1, using the flow cytometric method described  
156 previously (24). In brief, fixed and permeabilised cells were labelled with an 18mer FITC-  
157 conjugated peptide nucleic acid (PNA) probe complementary to the telomere repeat sequence,  
158 using kit K5327 (Dako, Denmark), and counterstained with propidium iodide (PI) to measure  
159 DNA content and identify cell cycle stage. As a reference, cells from a tetraploid line with long  
160 telomeres (cell line 1301; accession number 01051619, European Collection of Cell Cultures,  
161 UK) were included in all tubes and used to calculate the relative TL in lymphocytes in the test  
162 samples. Each sample was prepared in paired tubes. For the purpose of quantifying background  
163 fluorescence of both the sample and reference cells one tube was incubated in hybridisation  
164 mixture with the PNA probe, while the paired tube was incubated in hybridisation mixture only.  
165 TL and DNA content measurements were acquired using a FACSCalibur flow cytometer (Becton  
166 Dickinson) and analysed using BD CellQuest<sup>TM</sup> Pro software (v5.2). A mean FITC  
167 fluorescence value was obtained for the sample and 1301 cells in the labelled and unlabelled  
168 samples by gating specifically at G0-1 phase of the cell cycle. TL of sample cells relative to that  
169 of 1301 cells was then calculated, with correction for ploidy (DNA index) of the different cell  
170 populations. Baseline TL was mean of n=20 (CV 8%), all points thereafter were a mean of n=10  
171 replicates per treatment per time point.

## 172 **Determination of chromosomal instability and damage using**

### 173 **CBMN-Cyt assay**

174 Chromosomal damage was assessed using a modified form of the CBMN-Cyt assay, the standard  
175 protocol for which has been described in detail elsewhere (8). In brief, duplicate 500  $\mu$ L  
176 subcultures were established from cells harvested each day, at a concentration of  $0.3 \times 10^6$  viable  
177 cells / mL. Cytochalasin B (CytB) ( $4.5 \mu\text{g} / \text{mL}$ ; Sigma, Australia) was added for the purpose of  
178 blocking cytokinesis, and cells were harvested after 24h by cyto centrifugation (Shandon  
179 Scientific, Cheshire, England). Slides were air-dried for 10min, fixed and stained using the  
180 commercial kit ‘Diff Quik’ (Lab Aids, Narrabeen, Australia). Slides were scored by one person  
181 (CB) using established criteria described by Fenech (8). In all, 1000 binucleated (BN) cells per  
182 duplicate culture (total 2000 BN cells per treatment per sample point) were scored for frequency  
183 of validated biomarkers of chromosomal instability (CIN) and damage, ie. BN cells containing  
184 micronuclei (MN), nucleoplasmic bridges (NPB) or nuclear buds (NBud). In addition, cells  
185 displaying ‘fused’ (FUS) nuclear morphologies, were scored in this study using criteria  
186 previously defined (10). Cytotoxic and cytostatic effects were determined in 500 cells per  
187 duplicate culture by scoring the rate of necrosis, apoptosis and nuclear division index (NDI).  
188 NDI was calculated as  $\text{NDI} = (M1 + 2M2 + 3M_{\geq 3})/N$ , where  $M1$ ,  $M2$  and  $M_{\geq 3}$  represent the  
189 number of cells with 1, 2 or  $\geq 3$  nuclei, and  $N$  is the total number of viable cells scored (i.e.  
190 excluding necrotic and apoptotic cells).

191

### 192 **DNA isolation and global DNA methylation**

193 DNA was isolated using a DNEasy blood and tissue kit (Qiagen, Cat no. 69506) as per  
194 manufacturer’s instructions. Methyl-cytosine content, as a percentage of total cytosine content,  
195 was estimated using the MethylFlash Methylated DNA Quantification Kit (Colorimetric)



196 (Epigentek, USA, Catalog No P-1034), following manufacturer's instructions. The percentage of  
197 methylated cytosines in each sample was estimated using the following formula:

$$198 \quad \% \text{ 5-meC} = ((\text{sample OD} - \text{neg control OD}) / S) / (\text{pos control OD} - \text{neg control OD}) \times 2 / P) \times \\ 199 \quad 100\%$$

200 where OD is the optical density reading for each well (at 450 nm), 'neg' is negative control, S is  
201 the amount of input sample DNA in ng (ie. 100 ng was added per well), 'pos' is positive control,  
202 and P is the amount of positive control in ng. The numeral 2 in the denominator is required to  
203 normalise 5-meC in the positive control to 100%, as the sample provided in the kit is only 50%  
204 methylated. Samples were analysed in triplicate.

205

## 206 **Statistical analyses**

207 Data are shown as mean  $\pm$  SEM for all figures and tables. Two-way analysis of variance  
208 (ANOVA) was used to compare the effects for treatment ([5azadC]), time, and the interactive  
209 effect of these two factors. Pair-wise comparison of significance was determined using  
210 Bonferroni post-hoc test. Significance was accepted at  $p < 0.05$ . The area under the curve  
211 (AUC) for the relationship between changes in TL with time, was measured to obtain a total  
212 effect measure. Area under the curve (AUC) data represents the net area of the region in the xy  
213 plane bounded by the graph, where x is time (days) and y represents the parameter in question.  
214 All statistical analyses were performed using Graphpad PRISM 4.0 (GraphPad Inc., San Diego,  
215 CA).

216

## 218 **Results**

### 219 **5azadC exposure causes reduced nuclear division index and** 220 **increased necrosis**

221 The percentage of viable cells reduced in the 1.0  $\mu\text{M}$  condition from 98% at day 0 to 40.6%  
222 at day 4 (p trend < 0.0001) (Fig 1A). Cells with necrotic morphology increased in both the  
223 0.2 and 1.0  $\mu\text{M}$  5azadC conditions, to approximately 50% cell death in the 1.0  $\mu\text{M}$  cultures  
224 by day 4 (p trend = 0.003) (Fig 1B). Consistent with these observations, nuclear division  
225 index (NDI) reduced significantly in both 5azadC concentrations (Fig 1C).

226

227 **Fig 1. Impact of 5azadC on human WIL2-NS cells cultured in complete medium**  
228 **containing 0, 0.2 or 1.0  $\mu\text{M}$  5azadC over 4 days; (A) cell viability (%), (B) necrosis (%),**  
229 **and (C) nuclear division index (NDI).** (N = 2. Error bars indicate SEM. Groups not sharing  
230 the same letter at each time point differ significantly from each other, as measured by the  
231 Bonferroni post-hoc test. Data tables alongside each graph indicate ANOVA p values for  
232 [5azadC], time and their interaction; figures in parentheses represent the degree of variance  
233 explained by each factor (%)).

## 235 **5azadC causes telomere lengthening and global hypomethylation**

236 Exposure to 5azadC caused significant, dose dependent, increase in TL (Fig 2A). In the 1.0  
237  $\mu\text{M}$  cultures TL increased by 172% from  $19.2 \pm 0.4$  (mean  $\pm$  SEM) at day 0, to  $33.1 \pm 0.6$  at  
238 day 1, 156% longer than TL of cells maintained in  $0 \mu\text{M}$  5azadC for the same period ( $21.2 \pm$   
239  $0.5$ ). At days 3 and 4, TL in cells cultured in  $1.0$  and  $0.2 \mu\text{M}$  5azadC were  $\sim 150\%$  and  
240  $\sim 130\%$  greater, respectively, than that of cells cultured over the same time period without  
241 5azadC (Fig 2A). [5azadC] accounted for 25.3% of variance in TL ( $p < 0.0001$ ), 32.7% was  
242 due to time ( $p < 0.0001$ ), with 30% attributable to the interaction of both factors ( $p < 0.0001$ ).  
243 Area under the curve for TL versus time of cells cultured in  $1.0 \mu\text{M}$  was 111, 28% greater  
244 than that of untreated cells (AUC 87), and 5% greater than TL of cells grown in  $0.2 \mu\text{M}$   
245 5azadC (AUC 91).

246

247 **Fig 2. WIL2-NS cells grown in complete medium containing 0, 0.2 or 1.0  $\mu\text{M}$  5azadC**  
248 **over 4 days.** (A) Telomere length (expressed relative to that of reference cell line, 1301 (%),  
249  $n = 20$  at day 0,  $n = 10$  for all time points thereafter). (B) Global methylation status (% 5-  
250 meC,  $n = 3$ ). (Error bars indicate SEM. Points not sharing the same letter at each time point  
251 differ significantly, as measured by the Bonferroni post hoc test).

252

253 In untreated (control) cells, and those exposed to the  $0.2 \mu\text{M}$  5azadC, global DNA  
254 methylation increased progressively with time, possibly due to supraphysiological  
255 concentrations of folic acid and methionine in RPMI. In the  $1.0 \mu\text{M}$  5azadC cultures  
256 methylation decreased resulting in significant differences in methylation status between  
257 conditions, in a dose- and time-dependent manner. In fact, 24% of variance in %5-meC was

258 attributable to [5azadC] ( $p = 0.002$ ), 18% was due to time ( $p = 0.04$ ), with 25.3% of variance  
259 in methylation being explained by the interaction of [5azadC] with time ( $p = 0.3$ , not  
260 significant) (Fig 2B).

261

## 262 **5azadC causes a rapid increase in DNA damage**

263 Data generated with the CBMN-cyt assay showed exposure to 5azadC caused a time and  
264 dose-dependent increase in the frequency of biomarkers of chromosomal instability and DNA  
265 damage; micronuclei (MN), nucleoplasmic bridges (NPB), nuclear buds (NBuds), and fused  
266 nuclei (FUS) (8, 10). DNA damage is calculated based on the frequency of binucleated cells  
267 (BN), per 1000 BN, which contain one or more of each damage biomarker.

268

269 MN represent biomarkers of chromosome breakage or loss (8). The frequency of MN (per  
270 1000 BN) in the 1.0  $\mu\text{M}$  5azadC cultures increased 6-fold over the course of the 4-day study;  
271 from  $17 \pm 1.0$  at day 0, to  $103 \pm 14$  at day 4. Over the same time period MN in cells in 0.2  
272  $\mu\text{M}$  5azadC increased 4.5-fold to  $79.5 \pm 0.5$  at day 4, while the frequency of MN in control  
273 cultures (0  $\mu\text{M}$  5azadC) reduced to  $6.5 \pm 1.5$  at day 4 (Fig 3A).

274

275 **Fig 3. DNA damage in WIL2-NS cells grown in complete medium containing 0, 0.2 or**

276 **1.0  $\mu\text{M}$  5azadC for 4 days.** Graphs represent the frequency of binucleated (BN) cells

277 displaying one or more DNA damage biomarker per 1000 BN. (A) Micronuclei (BN-MN);

278 (B) nucleoplasmic bridges (BN-NPB); (C) nuclear buds (BN-NBud); (D) ‘fused nuclei’ (BN-

279 FUS) morphologies; and (E) total damage (frequency of BN cells with one or more MN

280 and/or NPB and/or NBud and/or FUS per 1000 BN). (N = 2 cultures, 1000 BN scored per

281 culture. Error bars indicate SEM. Groups not sharing the same letter at each time point

282 differ significantly from each other, as measured by the Bonferroni post-hoc test. Data tables

283 indicate ANOVA p values for [5azadC], time and their interaction; figures in parentheses  
284 represent the degree of variance explained by each factor (%).

285

286 Similar effects were observed for BN containing NPB, with day 4 frequencies increased 12-  
287 fold (from  $17 \pm 3$  at day 0 to  $234 \pm 18$ ), 7.8-fold (to  $149.5 \pm 15$ ), and 2-fold (to  $33 \pm 13$ ) for  
288 the 1.0, 0.2 and 0  $\mu\text{M}$  cultures, respectively (Fig 3B). NPB result from dicentric  
289 chromosomes caused by mis-repair of double strand DNA breaks, or telomere end fusions  
290 arising from telomere shortening and/or telomere dysfunction. NPB can indicate loss of  
291 telomeres due to DSB. These detached telomeric acentric chromosome fragments may still  
292 be detected with PCR or Southern blot TL assays. Only functional or visual assays, however,  
293 such as CBMN or FISH, can demonstrate that while telomeric DNA may be present, it is not  
294 located at chromosome ends, and thus is no longer protective or functional.

295

296 NBuds represent gene amplification, often arising due to breakage-fusion-bridge cycling.  
297 The frequency per 1000 BN cells containing one or more NBud increased from zero at day 0,  
298 to  $13 \pm 0$  at day 4 in the 1.0  $\mu\text{M}$  culture, and  $9 \pm 1$  in the 0.2  $\mu\text{M}$  condition (Fig 3C).

299

300 A 13-fold increase in BN cells with FUS nuclear morphologies was observed in the 1.0  $\mu\text{M}$   
301 condition, from a baseline of  $38.5 \pm 6.5$  per 1000 BN, to  $510 \pm 34$  at day 4. In the 0.2  $\mu\text{M}$   
302 condition FUS cells increased 5-fold to  $347 \pm 68$ , while frequencies in the control condition  
303 remained stable (Fig 3D). Examples of the FUS morphologies observed with 5azadC  
304 exposure are provided in Fig 4.

305

306 **Fig 4. Representative photomicrographs of nucleoplasmic bridges (NPB) and fused**  
307 **(FUS) morphologies in WIL2-NS cells cultured for four days in medium containing 1.0**

308  **$\mu$ M 5azadC, blocked at the binucleate (BN) stage using cytochalasin-B.** (A) An example  
309 of a BN cell displaying two clearly discernible NPBs; (B) an example of a BN cell displaying  
310 four discrete NPBs; (C-F) Examples of BN cells with FUS morphologies (1000x  
311 magnification).

312

313

314 When examining the total combined frequency of BN cells containing a damage biomarker  
315 (ie. one or more MN and/or NPB and/or NBud and/or FUS morphology), 30% of variance  
316 was attributable to [5azadC] ( $p < 0.0001$ ), 44% was attributable to time ( $p < 0.0001$ ), and  
317 24% of the observed variance could be explained by the interaction of both factors ( $p <$   
318  $0.0001$ ), leaving only 2% of the variance unexplained (Fig 3E).

319

320

## 322 **Discussion**

323 5azadC (decitabine), is used therapeutically to treat myelodysplastic conditions with dosage  
324 protocols resulting in plasma concentrations in the range of 0.12 – 5.6  $\mu$ M (4). The  
325 hypothesis for the current work, that exposure to 5azadC, within a clinically relevant range,  
326 would cause an increase in both chromosomal instability, and telomere length (TL), was  
327 supported by the data.

328

329 Strong dose-dependent increases were observed for the frequency of BN cells containing one  
330 or more biomarker of DNA damage (MN, NPB, NBud, or FUS). The increase in MN  
331 indicates chromosome loss or dysfunction and/or double strand DNA breaks (DSB) (8).

332 These observations are consistent with previous work on the effects of 5azadC showing that  
333 only a few hours exposure caused single and double strand breaks, together with de-  
334 condensation of genetically inactive chromatin (25). 5azadC is a robust inducer of  $\gamma$ -H2AX,  
335 an early marker of DSB, activation of DNA repair proteins, and DNA fragmentation (7, 26,  
336 27). Interestingly, the reduction of DNMT1 caused by 5azadC also impairs the cell's  
337 capacity to respond to damage, as DNMT1 is required to co-localise with  $\gamma$ -H2AX at sites of  
338 damage. 5azadC also blunts the p53 and CHK1 responses in HeLa and HCT116 cells, further  
339 impacting an effective repair response (26). The concentration at which 5azadC-induced  $\gamma$ -  
340 H2AX foci and DNA strand breakage in these studies was at or below 1  $\mu$ M (26), consistent  
341 with those used in the present study. These reflect clinically relevant plasma concentrations  
342 which range between 0.12 and 5.6  $\mu$ M (4). Furthermore it was shown 5-azacytidine treated  
343 lymphocytes have been shown to exhibit distinct under-condensation in the heterochromatic  
344 regions of chromosomes 1, 9, 15, 16 and Y, and increases in the frequency of their loss via  
345 MN (9). These features are similar to the ICF syndrome in which DNMT 3B is defective  
346 (28).

347

348 NPBs are formed by DNA mis-repair following a DSB, or chromosome end fusion when  
349 telomeres become shortened and/or dysfunctional (8, 28-30). These fusions result in the  
350 formation of dicentric chromosomes which then present as NPBs in binucleated (BN) cells,  
351 suspended at telophase with the chromatids unable to separate. In cells that have not been  
352 chemically blocked at the BN stage, dicentric chromosomes will eventually break unevenly at  
353 anaphase, resulting in each of the daughter nuclei receiving abnormal gene dosage. The  
354 resulting uncapped ends are likely to fuse again with each other, leading to increasing levels  
355 of genomic disarray and instability. This is the breakage-fusion-bridge (BFB) cycle, an early  
356 event after telomere loss which leads to amplification of genes (including oncogenes), and  
357 altered gene dosage in daughter cells (8, 31). The increase in NBuds observed in cultures  
358 containing 5azadC is indicative of amplified genes or unresolved DNA repair complexes  
359 being actively ejected from the cell. Previous work has shown that, in 5azadC treated cells,  
360 BFB cycles can last many generations after the initial sister chromatid fusion (25, 31). The  
361 present findings are also consistent with those of Gisselsson *et al* (2005), who found an  
362 increased frequency of NPB in ICF cells that lack genes encoding DNMT3b (28).

363

364 In addition to the standard CBMN-cyt assay biomarkers, the frequency of novel FUSED  
365 (FUS) morphologies was also scored (8, 10). Previous findings showed that FUS nuclei  
366 increased significantly in WIL2-NS cells and primary lymphocytes cultured under folic acid-  
367 deficient (hypomethylating) conditions (10). Dual-colour fluorescence *in situ* hybridisation  
368 (FISH) analysis revealed centromeric DNA was present in the fusion structures between the  
369 nuclei. A mechanistic model was then proposed whereby hypomethylation alters the  
370 topology of the binding sites of key enzymes required for nuclear division (including  
371 Topoisomerase II and CENP-B), resulting in mitotic disruption (10, 32). As predicted,



372 frequencies of FUS in the 5azadC treated cells increased significantly (13-fold) over 4 days,  
373 lending further weight to use of this biomarker as an indicator of hypomethylation-induced  
374 mitotic dysregulation.

375

376 Telomere elongation also occurred in a dose-dependent manner within 24 hours of 5azadC  
377 exposure, and was maintained to the completion of the study at day 4. There are conflicting  
378 findings with respect to TL with 5azadC treatment. In the breast cancer cell line 21NT TL  
379 increased (33), whereas in chronic leukemia cell lines telomeres shortened (34). The present  
380 findings are consistent with those of previous work in WIL2-NS cultured under (methyl  
381 donor) folic acid-deficient conditions, where the longest TL was recorded in the most  
382 severely FA-depleted condition (13). This observation is also consistent with the work of  
383 Gonzalo et al (2006), in which mouse embryonic stem cells genetically deficient in DNMT  
384 were found to have significantly longer telomeres than wild-type (12, 14). Epigenetic  
385 changes also affected TL in a panel of neoplastic cells, with significant negative associations  
386 between TL and methylation status at pericentromeric and subtelomeric sites (35). These  
387 authors demonstrated that subtelomeric hypomethylation was strongly associated with  
388 increased TL, and that this effect was independent of the expression, or activity, of the  
389 telomerase enzyme (35).

390

## 392 **Conclusions**

393 The impact of 5azadC has not previously been examined using the comprehensive panel of DNA  
394 damage biomarkers included in the CBMN-Cytome assay. It is also essential to consider  
395 telomere length data in the context of chromosomal stability; as such, the findings presented here  
396 are novel. While consistent with previous observations of cytotoxicity, until such time as these  
397 assays can be replicated in other models the findings reported here are relevant only to the WIL2-  
398 NS cell line. We can conclude that, in this model, 5azadC at clinically relevant dosages induces  
399 hypomethylation and increased telomere length, BFB cycling, altered gene dosage and nuclear  
400 budding, chromosome breakage, mitotic dysregulation and high levels of DNA damage. These  
401 data also suggest that lower doses of 5azadC may provide a clinically efficacious level of  
402 hypomethylation, while minimising cytotoxic and genotoxic side effects, and risk for future  
403 secondary cancers caused by induced chromosomal instability.

404

405 **Author contributions:** CB carried out all experimental work (cell culture, TL, CBMN-cyt  
406 assay, DNA methylation), data analysis and drafted the manuscript. GM, MF and CB contributed  
407 to the initial study concept and design, and interpretation of data. All authors had full access to  
408 the data. MF and GM both provided critical revision of the text and figures. Sadly, GM passed  
409 away in October 2016, thus CB and MF read and approved the final manuscript.

410

## 411 **Acknowledgements:**

412 The authors gratefully acknowledge the technical support of Ms Maryam Hor.

413

414 **Declaration of conflict of interest:** None

415

## 417 **References**

- 418 1. Robertson KD. DNA methylation and human disease. *Nat Rev Genet.* 2005;6(8):597-610.
- 419 2. Feinberg AP, Ohlsson R, Henikoff S. The epigenetic progenitor origin of human cancer. *Nat*  
420 *Rev Genet.* 2006;7(1):21-33.
- 421 3. Yun S, Vincelette ND, Abraham I, Robertson KD, Fernandez-Zapico ME, Patnaik MM.  
422 Targeting epigenetic pathways in acute myeloid leukemia and myelodysplastic syndrome: a  
423 systematic review of hypomethylating agents trials. *Clinical epigenetics.* 2016;8:68.
- 424 4. Karahoca M, Momparler RL. Pharmacokinetic and pharmacodynamic analysis of 5-aza-2'-  
425 deoxycytidine (decitabine) in the design of its dose-schedule for cancer therapy. *Clinical*  
426 *epigenetics.* 2013;5(1):3.
- 427 5. Molokie R, Lavelle D, Gowhari M, Pacini M, Krauz L, Hassan J, et al. Oral  
428 tetrahydrouridine and decitabine for non-cytotoxic epigenetic gene regulation in sickle cell  
429 disease: A randomized phase 1 study. *PLoS Med.* 2017;14(9):e1002382.
- 430 6. Christman JK. 5-Azacytidine and 5-aza-2'-deoxycytidine as inhibitors of DNA methylation:  
431 mechanistic studies and their implications for cancer therapy. *Oncogene.* 2002;21(35):5483-  
432 95.
- 433 7. Maes K, De Smedt E, Lemaire M, De Raeve H, Menu E, Van Valckenborgh E, et al. The  
434 role of DNA damage and repair in decitabine-mediated apoptosis in multiple myeloma.  
435 *Oncotarget.* 2014;5(10):3115-29.
- 436 8. Fenech M. Cytokinesis-block micronucleus cytome assay. *Nat Protoc.* 2007;2(5):1084-104.
- 437 9. Guttenbach M, Schmid M. Exclusion of specific human chromosomes into micronuclei by 5-  
438 azacytidine treatment of lymphocyte cultures. *Experimental cell research.* 1994;211(1):127-  
439 32.
- 440 10. Bull CF, Mayrhofer G, Zeegers D, Mun GL, Hande MP, Fenech MF. Folate deficiency is  
441 associated with the formation of complex nuclear anomalies in the cytokinesis-block  
442 micronucleus cytome assay. *Environ Mol Mutagen.* 2012;53(4):311-23.

- 443 11. Blackburn EH. Structure and function of telomeres. *Nature*. 1991;350(6319):569-73.
- 444 12. Blasco MA. The epigenetic regulation of mammalian telomeres. *Nat Rev Genet*.  
445 2007;8(4):299-309.
- 446 13. Bull CF, Mayrhofer G, O'Callaghan NJ, Au AY, Pickett HA, Low GK, et al. Folate  
447 deficiency induces dysfunctional long and short telomeres; both states are associated with  
448 hypomethylation and DNA damage in human WIL2-NS cells. *Cancer prevention research*  
449 (Philadelphia, Pa). 2014;7(1):128-38.
- 450 14. Gonzalo S, Jaco I, Fraga MF, Chen T, Li E, Esteller M, et al. DNA methyltransferases  
451 control telomere length and telomere recombination in mammalian cells. *Nat Cell Biol*.  
452 2006;8(4):416-24.
- 453 15. Andersson U, Degerman S, Dahlin AM, Wibom C, Johansson G, Bondy ML, et al. The  
454 association between longer relative leukocyte telomere length and risk of glioma is  
455 independent of the potentially confounding factors allergy, BMI, and smoking. *Cancer*  
456 *causes & control : CCC*. 2019;30(2):177-85.
- 457 16. Aviv A, Anderson JJ, Shay JW. Mutations, Cancer and the Telomere Length Paradox.  
458 *Trends Cancer*. 2017;3(4):253-8.
- 459 17. Kachuri L, Saarela O, Bojesen SE, Davey Smith G, Liu G, Landi MT, et al. Mendelian  
460 Randomization and mediation analysis of leukocyte telomere length and risk of lung and  
461 head and neck cancers. *International journal of epidemiology*. 2018.
- 462 18. Ohali A, Avigad S, Ash S, Goshen Y, Luria D, Feinmesser M, et al. Telomere length is a  
463 prognostic factor in neuroblastoma. *Cancer*. 2006;107(6):1391-9.
- 464 19. Peacock SD, Massey TE, Vanner SJ, King WD. Telomere length in the colon is related to  
465 colorectal adenoma prevalence. *PLoS One*. 2018;13(10):e0205697.
- 466 20. Renner W, Krenn-Pilko S, Gruber HJ, Herrmann M, Langsenlehner T. Relative telomere  
467 length and prostate cancer mortality. *Prostate cancer and prostatic diseases*. 2018;21(4):579-  
468 83.

- 469 21. Satoh T, Yamamoto K, Miura KF, Sofuni T. Region-specific chromatin decondensation and  
470 micronucleus formation induced by 5-azacytidine in human TIG-7 cells. *Cytogenet Genome*  
471 *Res.* 2004;104(1-4):289-94.
- 472 22. Stopper H, Korber C, Gibis P, Spencer DL, Caspary WJ. Micronuclei induced by modulators  
473 of methylation: analogs of 5-azacytidine. *Carcinogenesis.* 1995;16(7):1647-50.
- 474 23. Stresemann C, Brueckner B, Musch T, Stopper H, Lyko F. Functional diversity of DNA  
475 methyltransferase inhibitors in human cancer cell lines. *Cancer research.* 2006;66(5):2794-  
476 800.
- 477 24. Bull CF, O'Callaghan NJ, Mayrhofer G, Fenech MF. Telomere length in lymphocytes of  
478 older South Australian men may be inversely associated with plasma homocysteine.  
479 *Rejuvenation Res.* 2009;12(5):341-9.
- 480 25. Haaf T. The effects of 5-azacytidine and 5-azadeoxycytidine on chromosome structure and  
481 function: implications for methylation-associated cellular processes. *Pharmacol Ther.*  
482 1995;65(1):19-46.
- 483 26. Pali SS, Van Emburgh BO, Sankpal UT, Brown KD, Robertson KD. DNA methylation  
484 inhibitor 5-Aza-2'-deoxycytidine induces reversible genome-wide DNA damage that is  
485 distinctly influenced by DNA methyltransferases 1 and 3B. *Molecular and cellular biology.*  
486 2008;28(2):752-71.
- 487 27. Sauntharajah Y, Sekeres M, Advani A, Mahfouz R, Durkin L, Radivoyevitch T, et al.  
488 Evaluation of noncytotoxic DNMT1-depleting therapy in patients with myelodysplastic  
489 syndromes. *The Journal of clinical investigation.* 2015;125(3):1043-55.
- 490 28. Gisselsson D, Shao C, Tuck-Muller CM, Sogorovic S, Palsson E, Smeets D, et al. Interphase  
491 chromosomal abnormalities and mitotic missegregation of hypomethylated sequences in ICF  
492 syndrome cells. *Chromosoma.* 2005;114(2):118-26.
- 493 29. Callen E, Surralles J. Telomere dysfunction in genome instability syndromes. *Mutation*  
494 *research.* 2004;567(1):85-104.

- 495 30. Slijepcevic P, Bryant PE. Chromosome healing, telomere capture and mechanisms of  
496 radiation-induced chromosome breakage. *International journal of radiation biology*.  
497 1998;73(1):1-13.
- 498 31. Lo AW, Sabatier L, Fouladi B, Pottier G, Ricoul M, Murnane JP. DNA amplification by  
499 breakage/fusion/bridge cycles initiated by spontaneous telomere loss in a human cancer cell  
500 line. *Neoplasia (New York, NY)*. 2002;4(6):531-8.
- 501 32. Jaco I, Canela A, Vera E, Blasco MA. Centromere mitotic recombination in mammalian  
502 cells. *J Cell Biol*. 2008;181(6):885-92.
- 503 33. Motevalli A, Yasaei H, Virmouni SA, Slijepcevic P, Roberts T. The effect of  
504 chemotherapeutic agents on telomere length maintenance in breast cancer cell lines. *Breast*  
505 *cancer research and treatment*. 2014;145(3):581-91.
- 506 34. Grandjenette C, Schnekenburger M, Karius T, Ghelfi J, Gaigneaux A, Henry E, et al. 5-aza-  
507 2'-deoxycytidine-mediated c-myc Down-regulation triggers telomere-dependent senescence  
508 by regulating human telomerase reverse transcriptase in chronic myeloid leukemia.  
509 *Neoplasia (New York, NY)*. 2014;16(6):511-28.
- 510 35. Vera E, Canela A, Fraga MF, Esteller M, Blasco MA. Epigenetic regulation of telomeres in  
511 human cancer. *Oncogene*. 2008;27(54):6817-33.
- 512

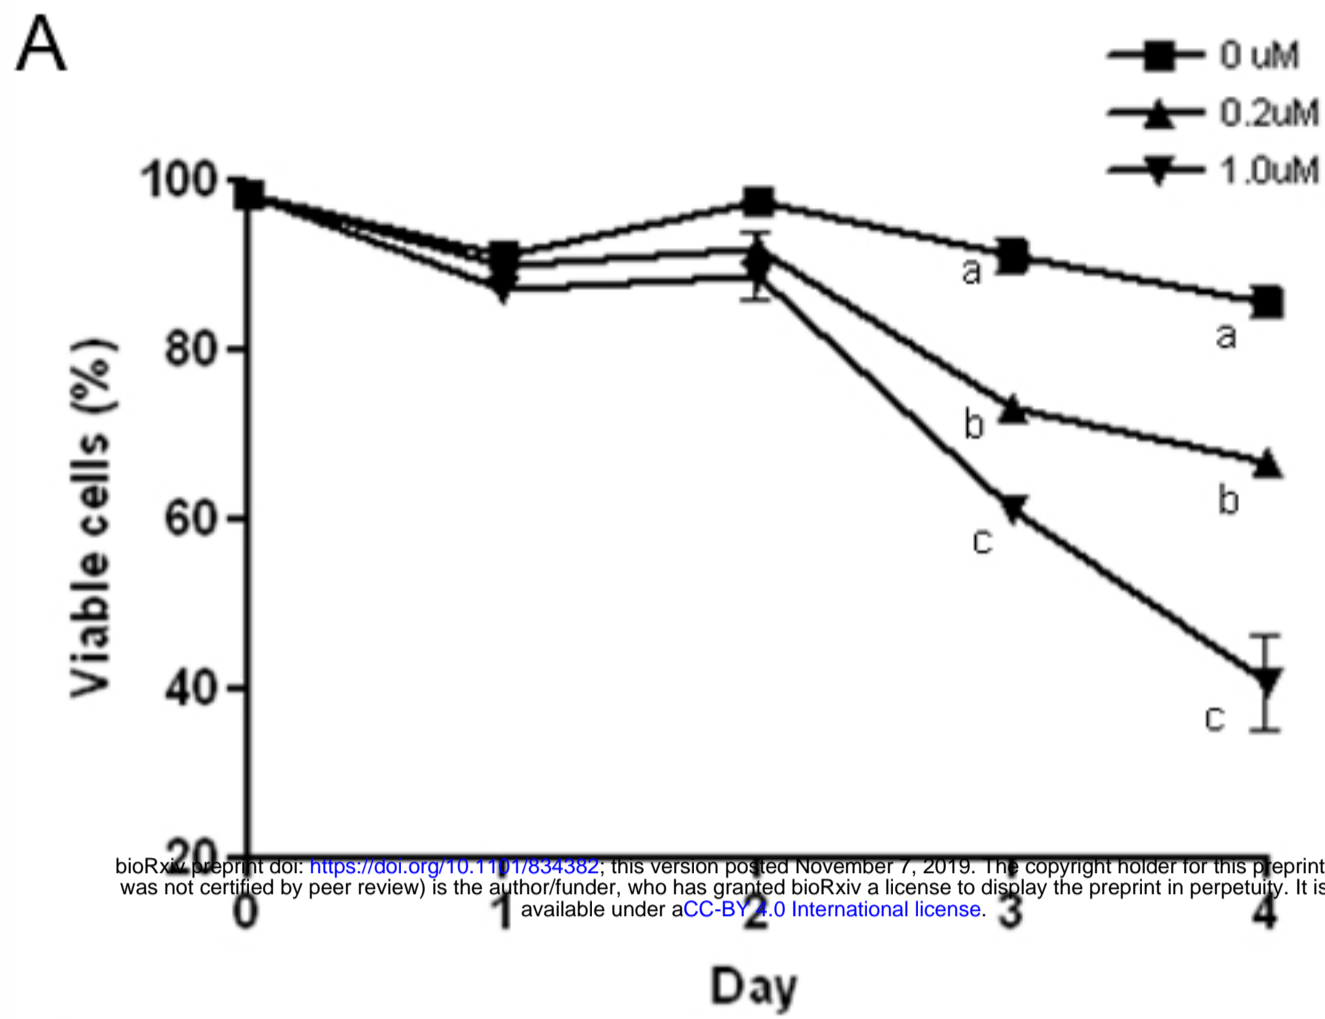

bioRxiv preprint doi: <https://doi.org/10.1101/1834382>; this version posted November 7, 2019. The copyright holder for this preprint (which was not certified by peer review) is the author/funder, who has granted bioRxiv a license to display the preprint in perpetuity. It is made available under aCC-BY 4.0 International license.

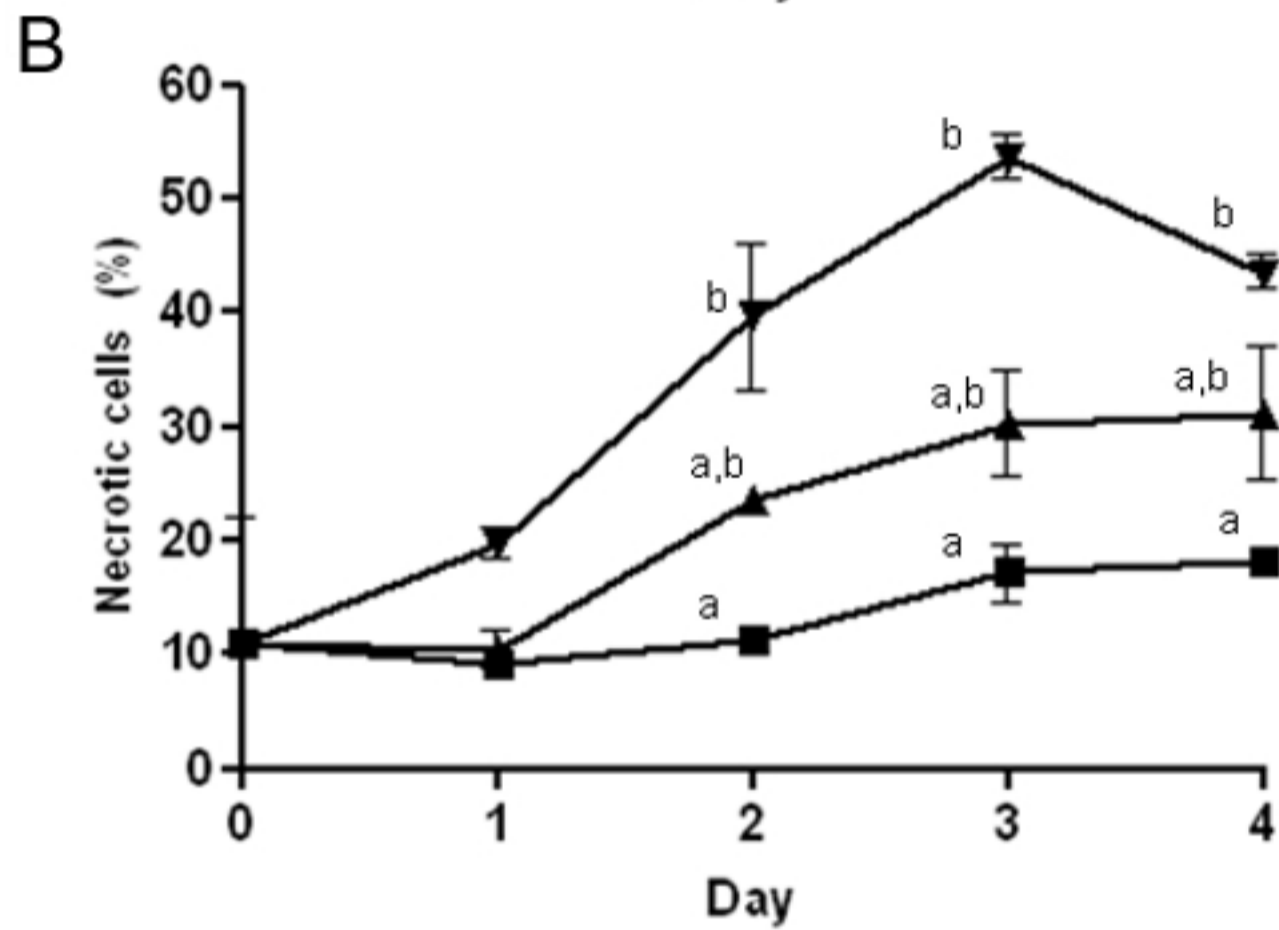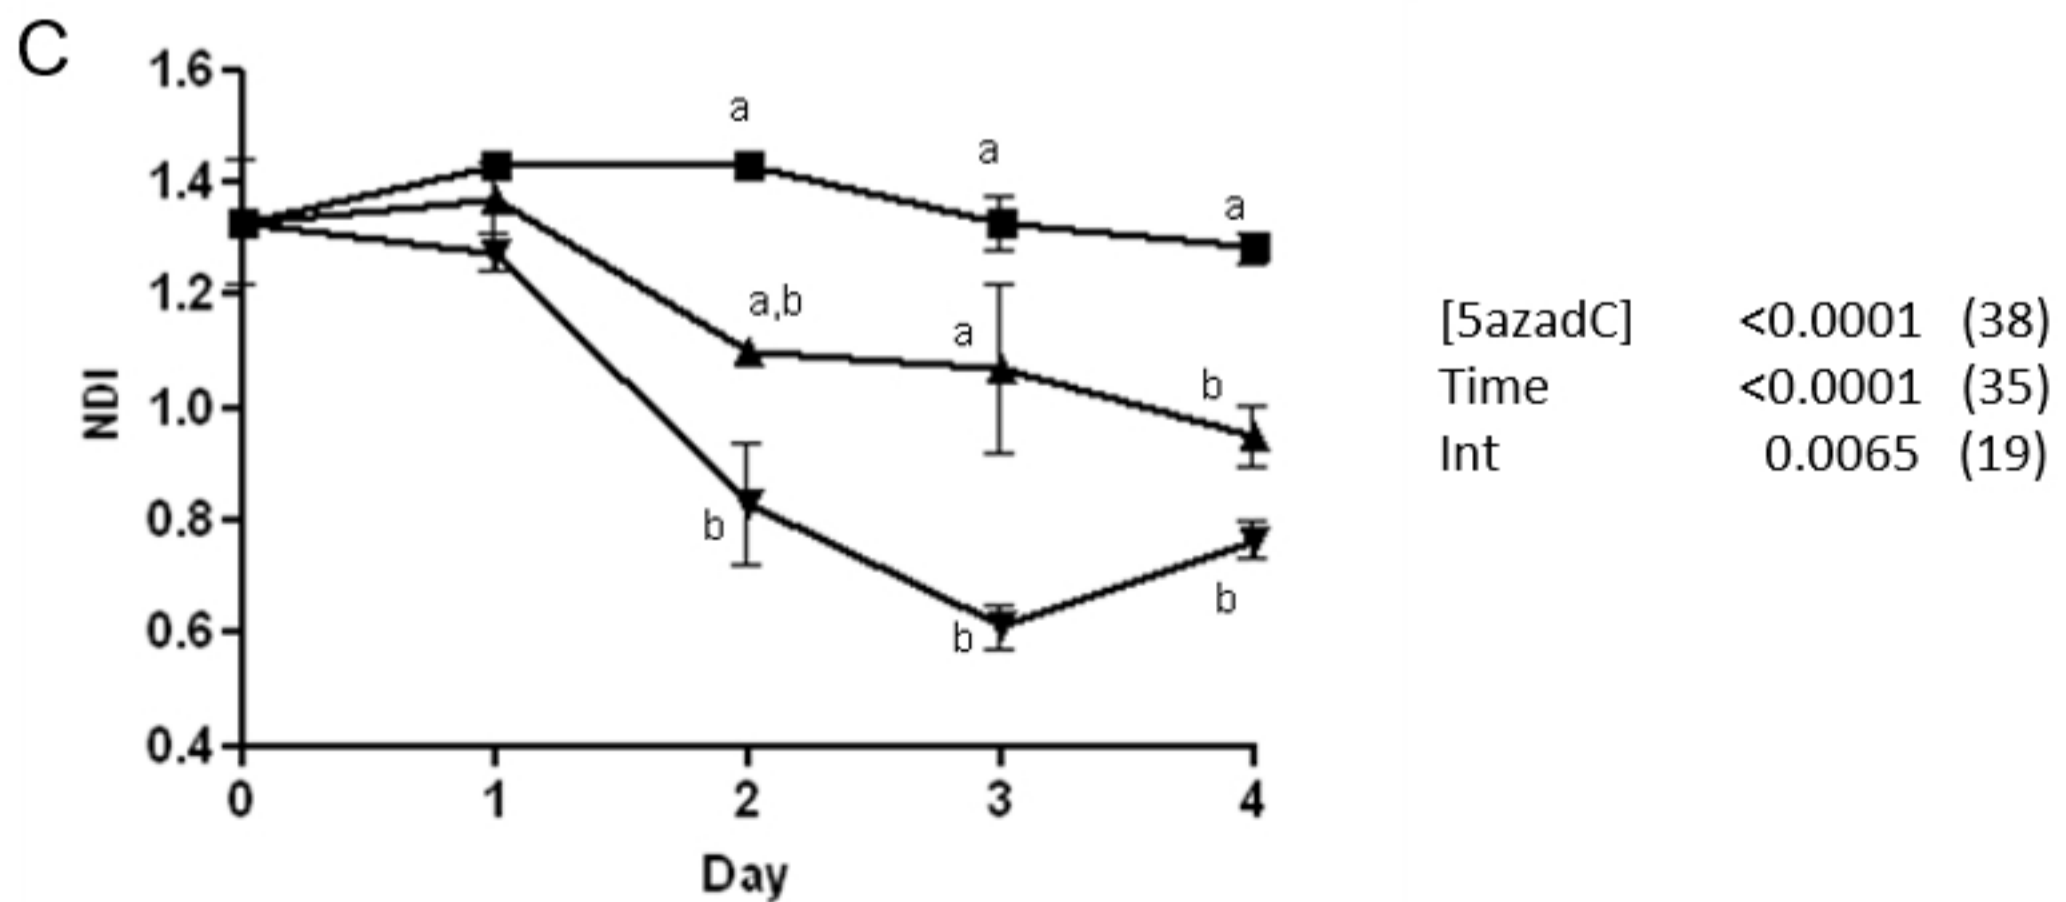

Figure 1



A

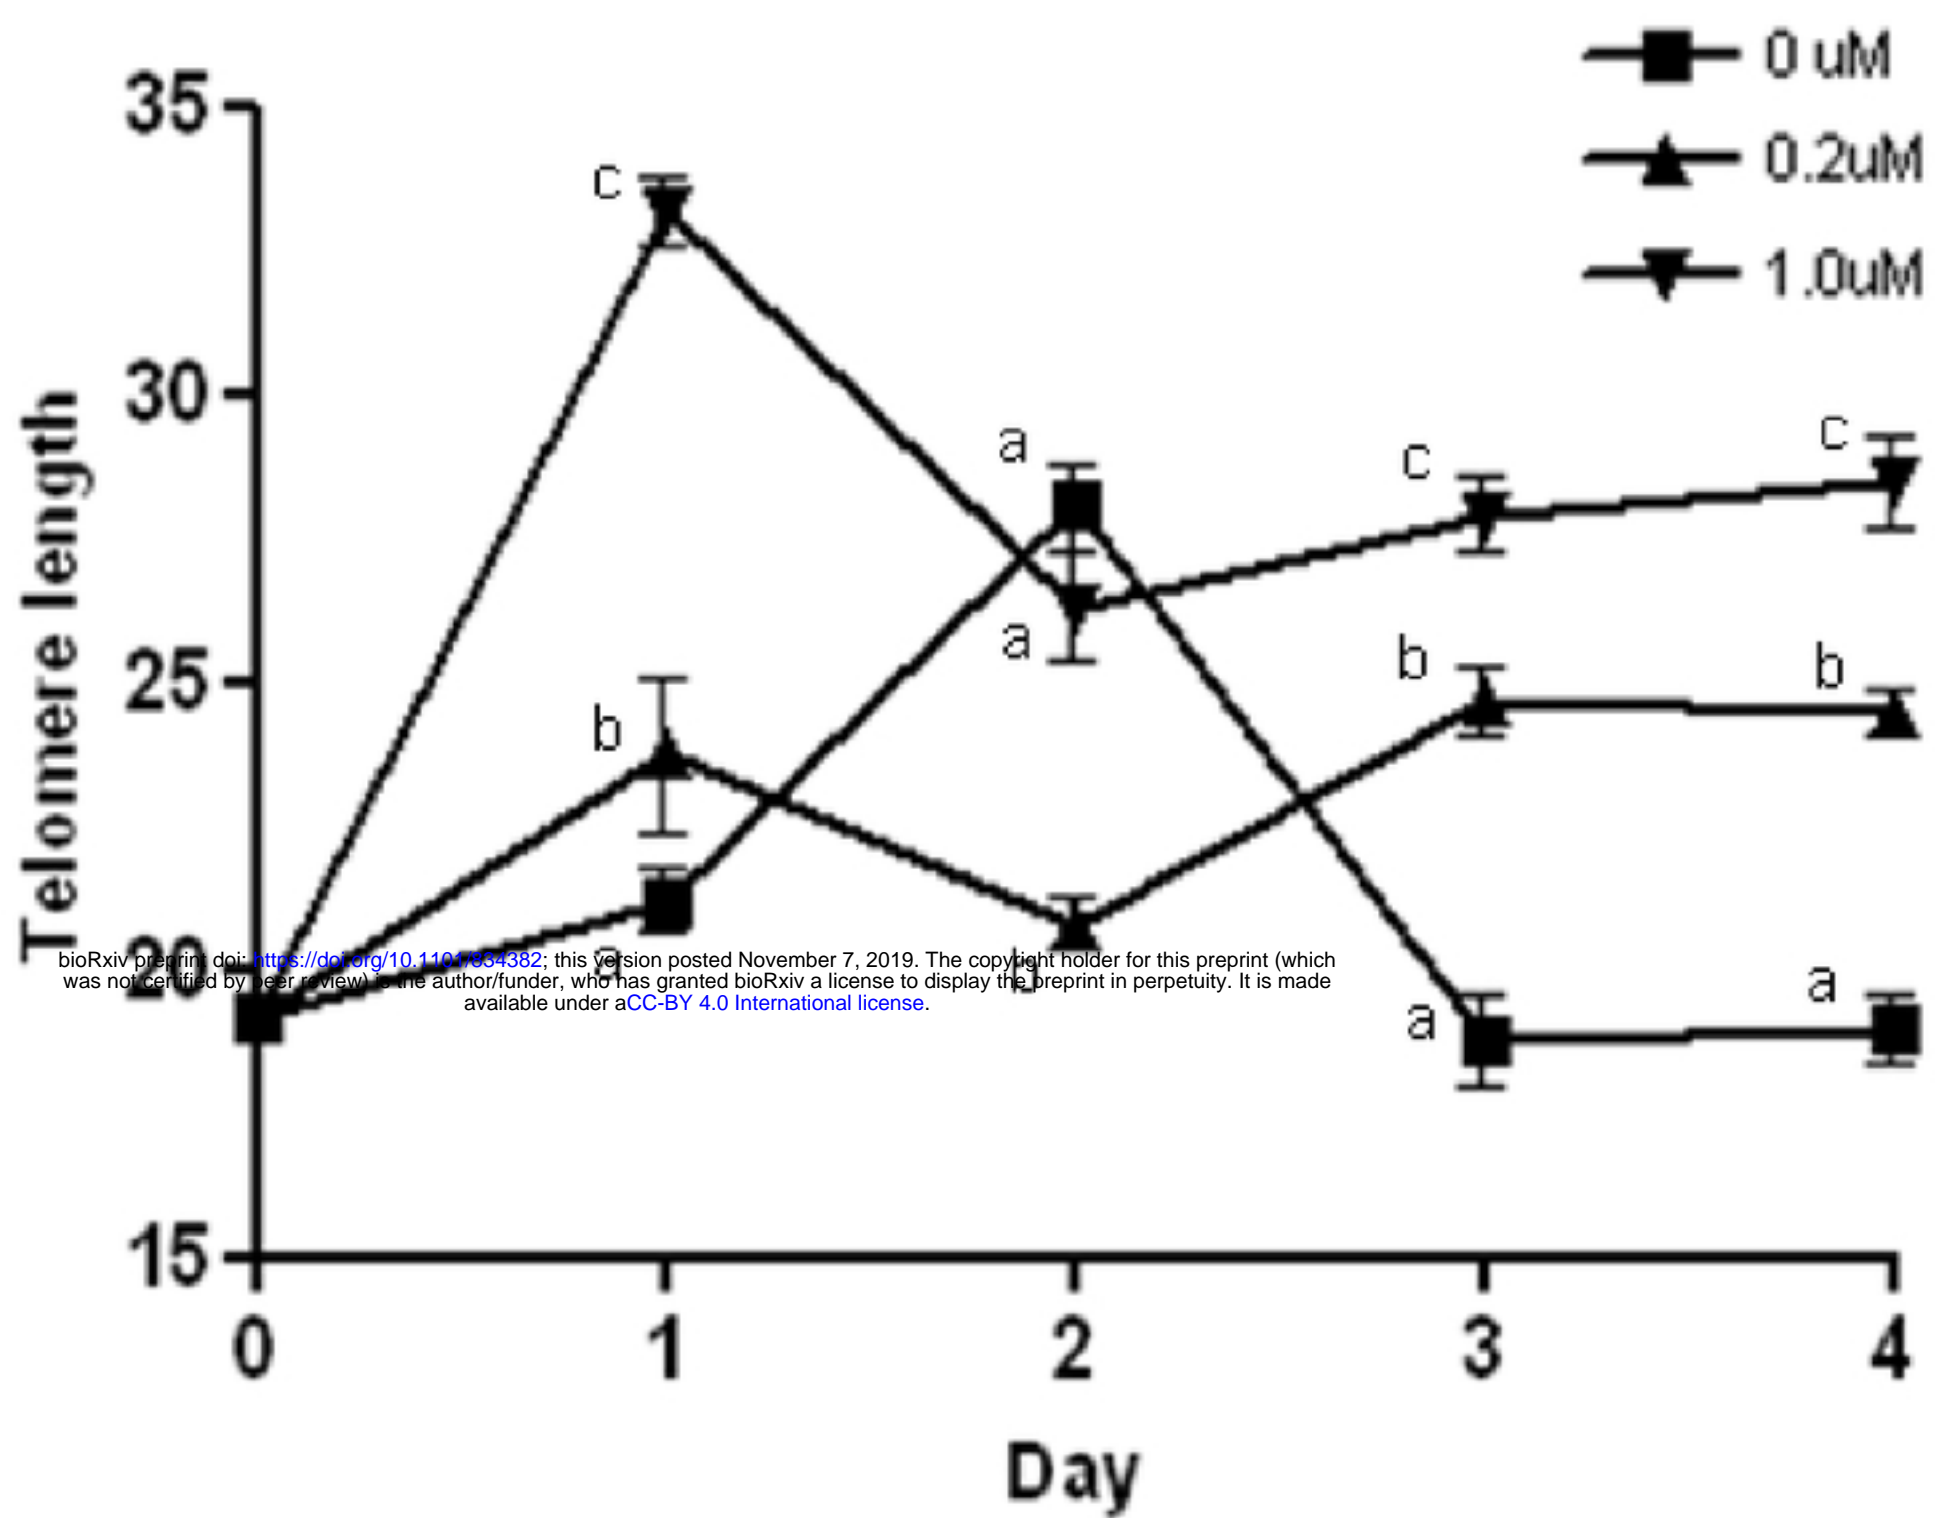

B

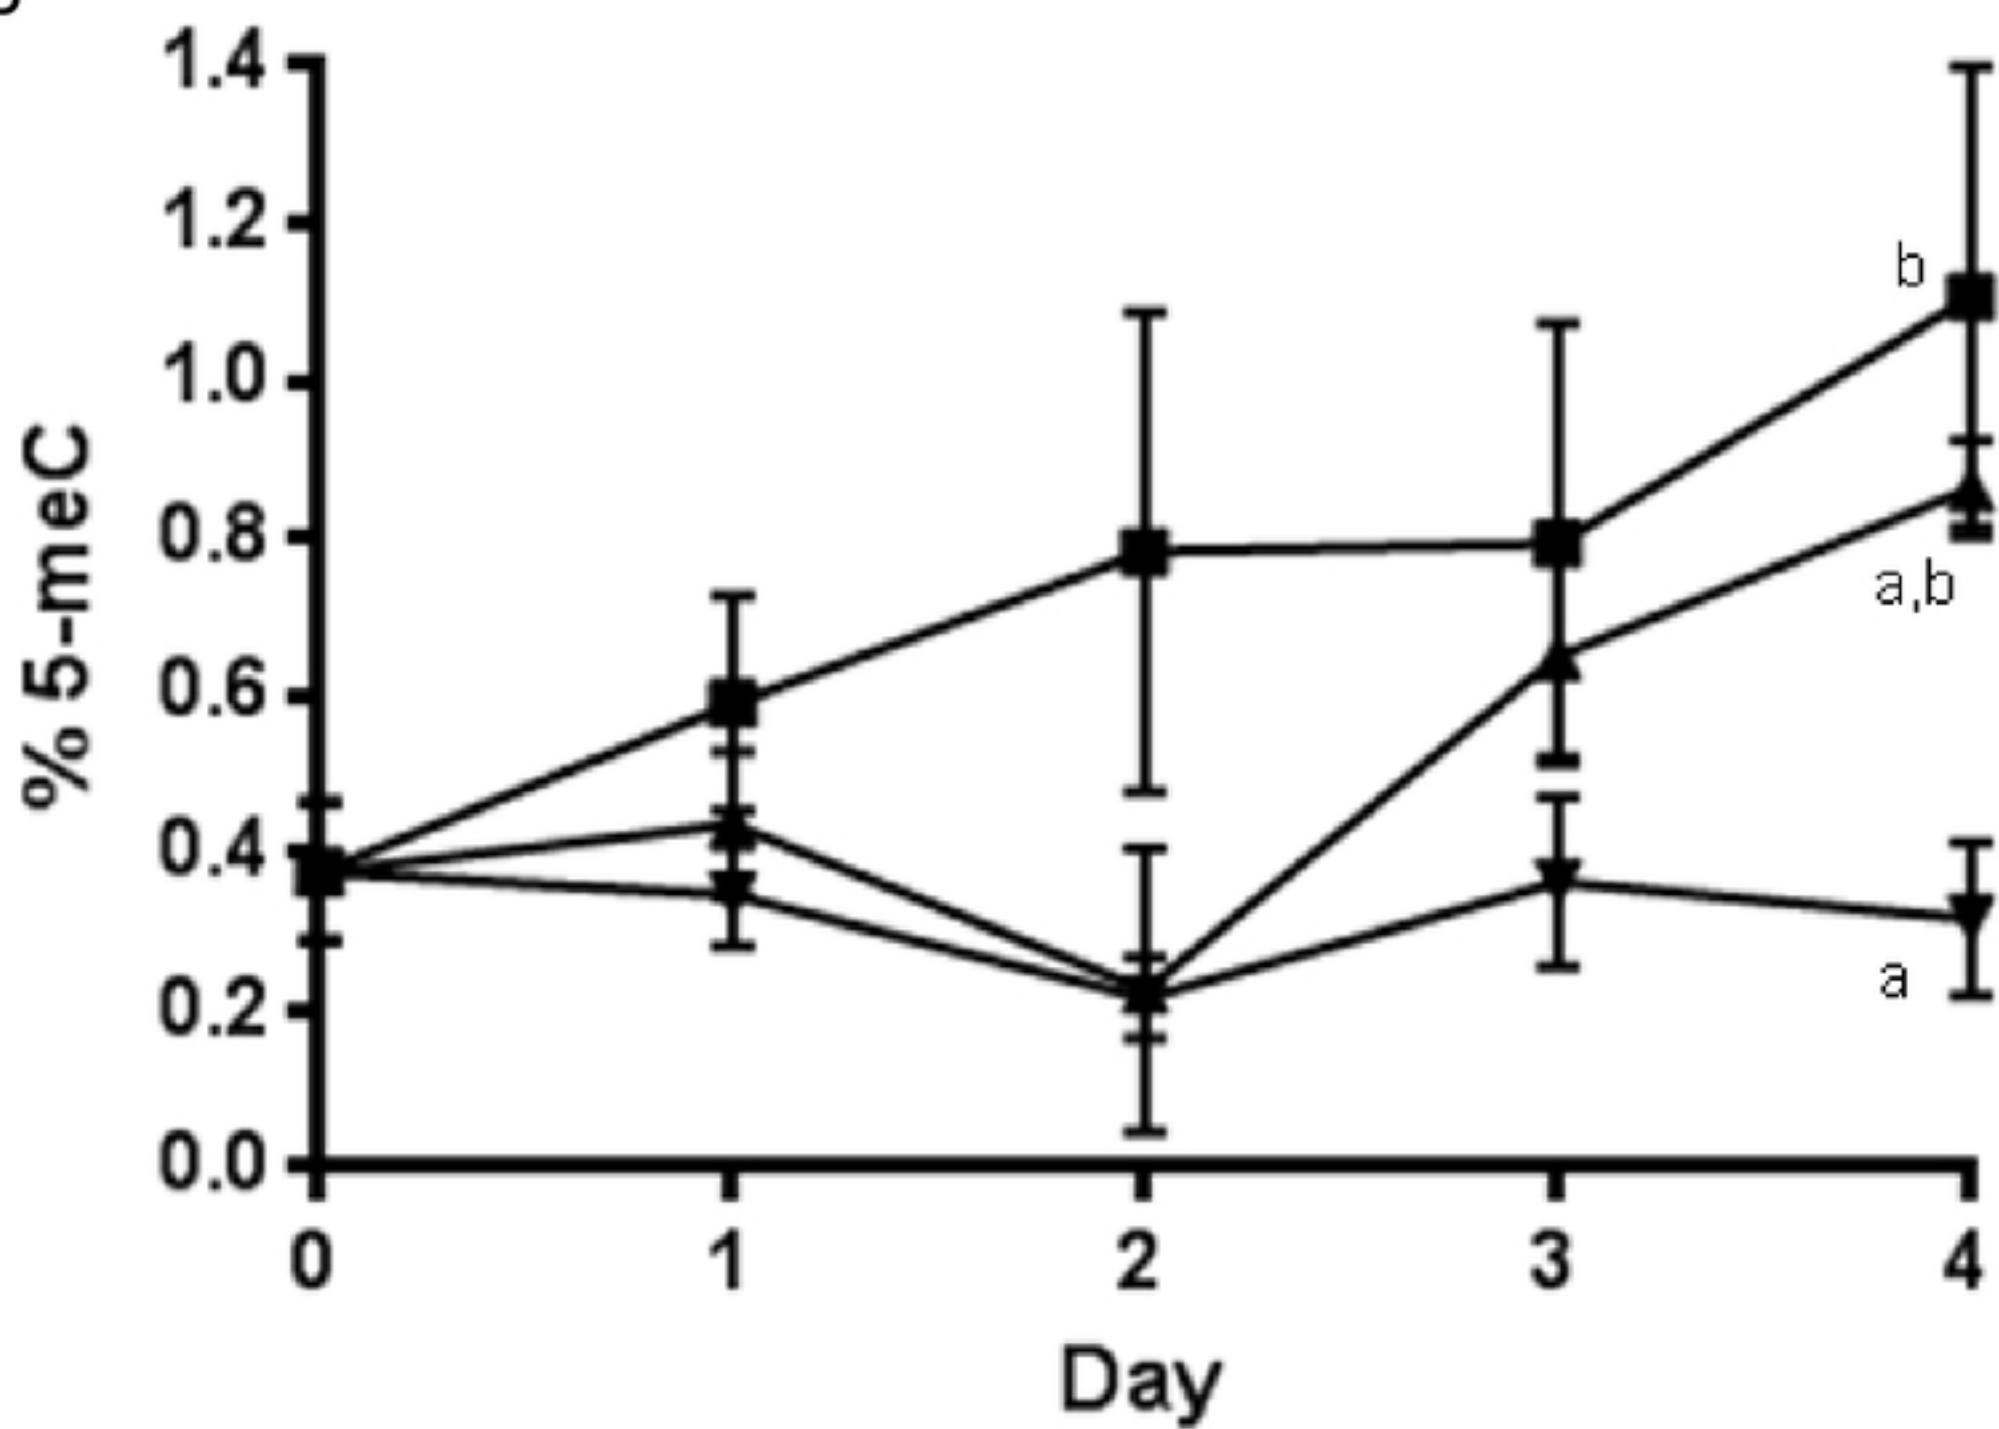

Figure 2



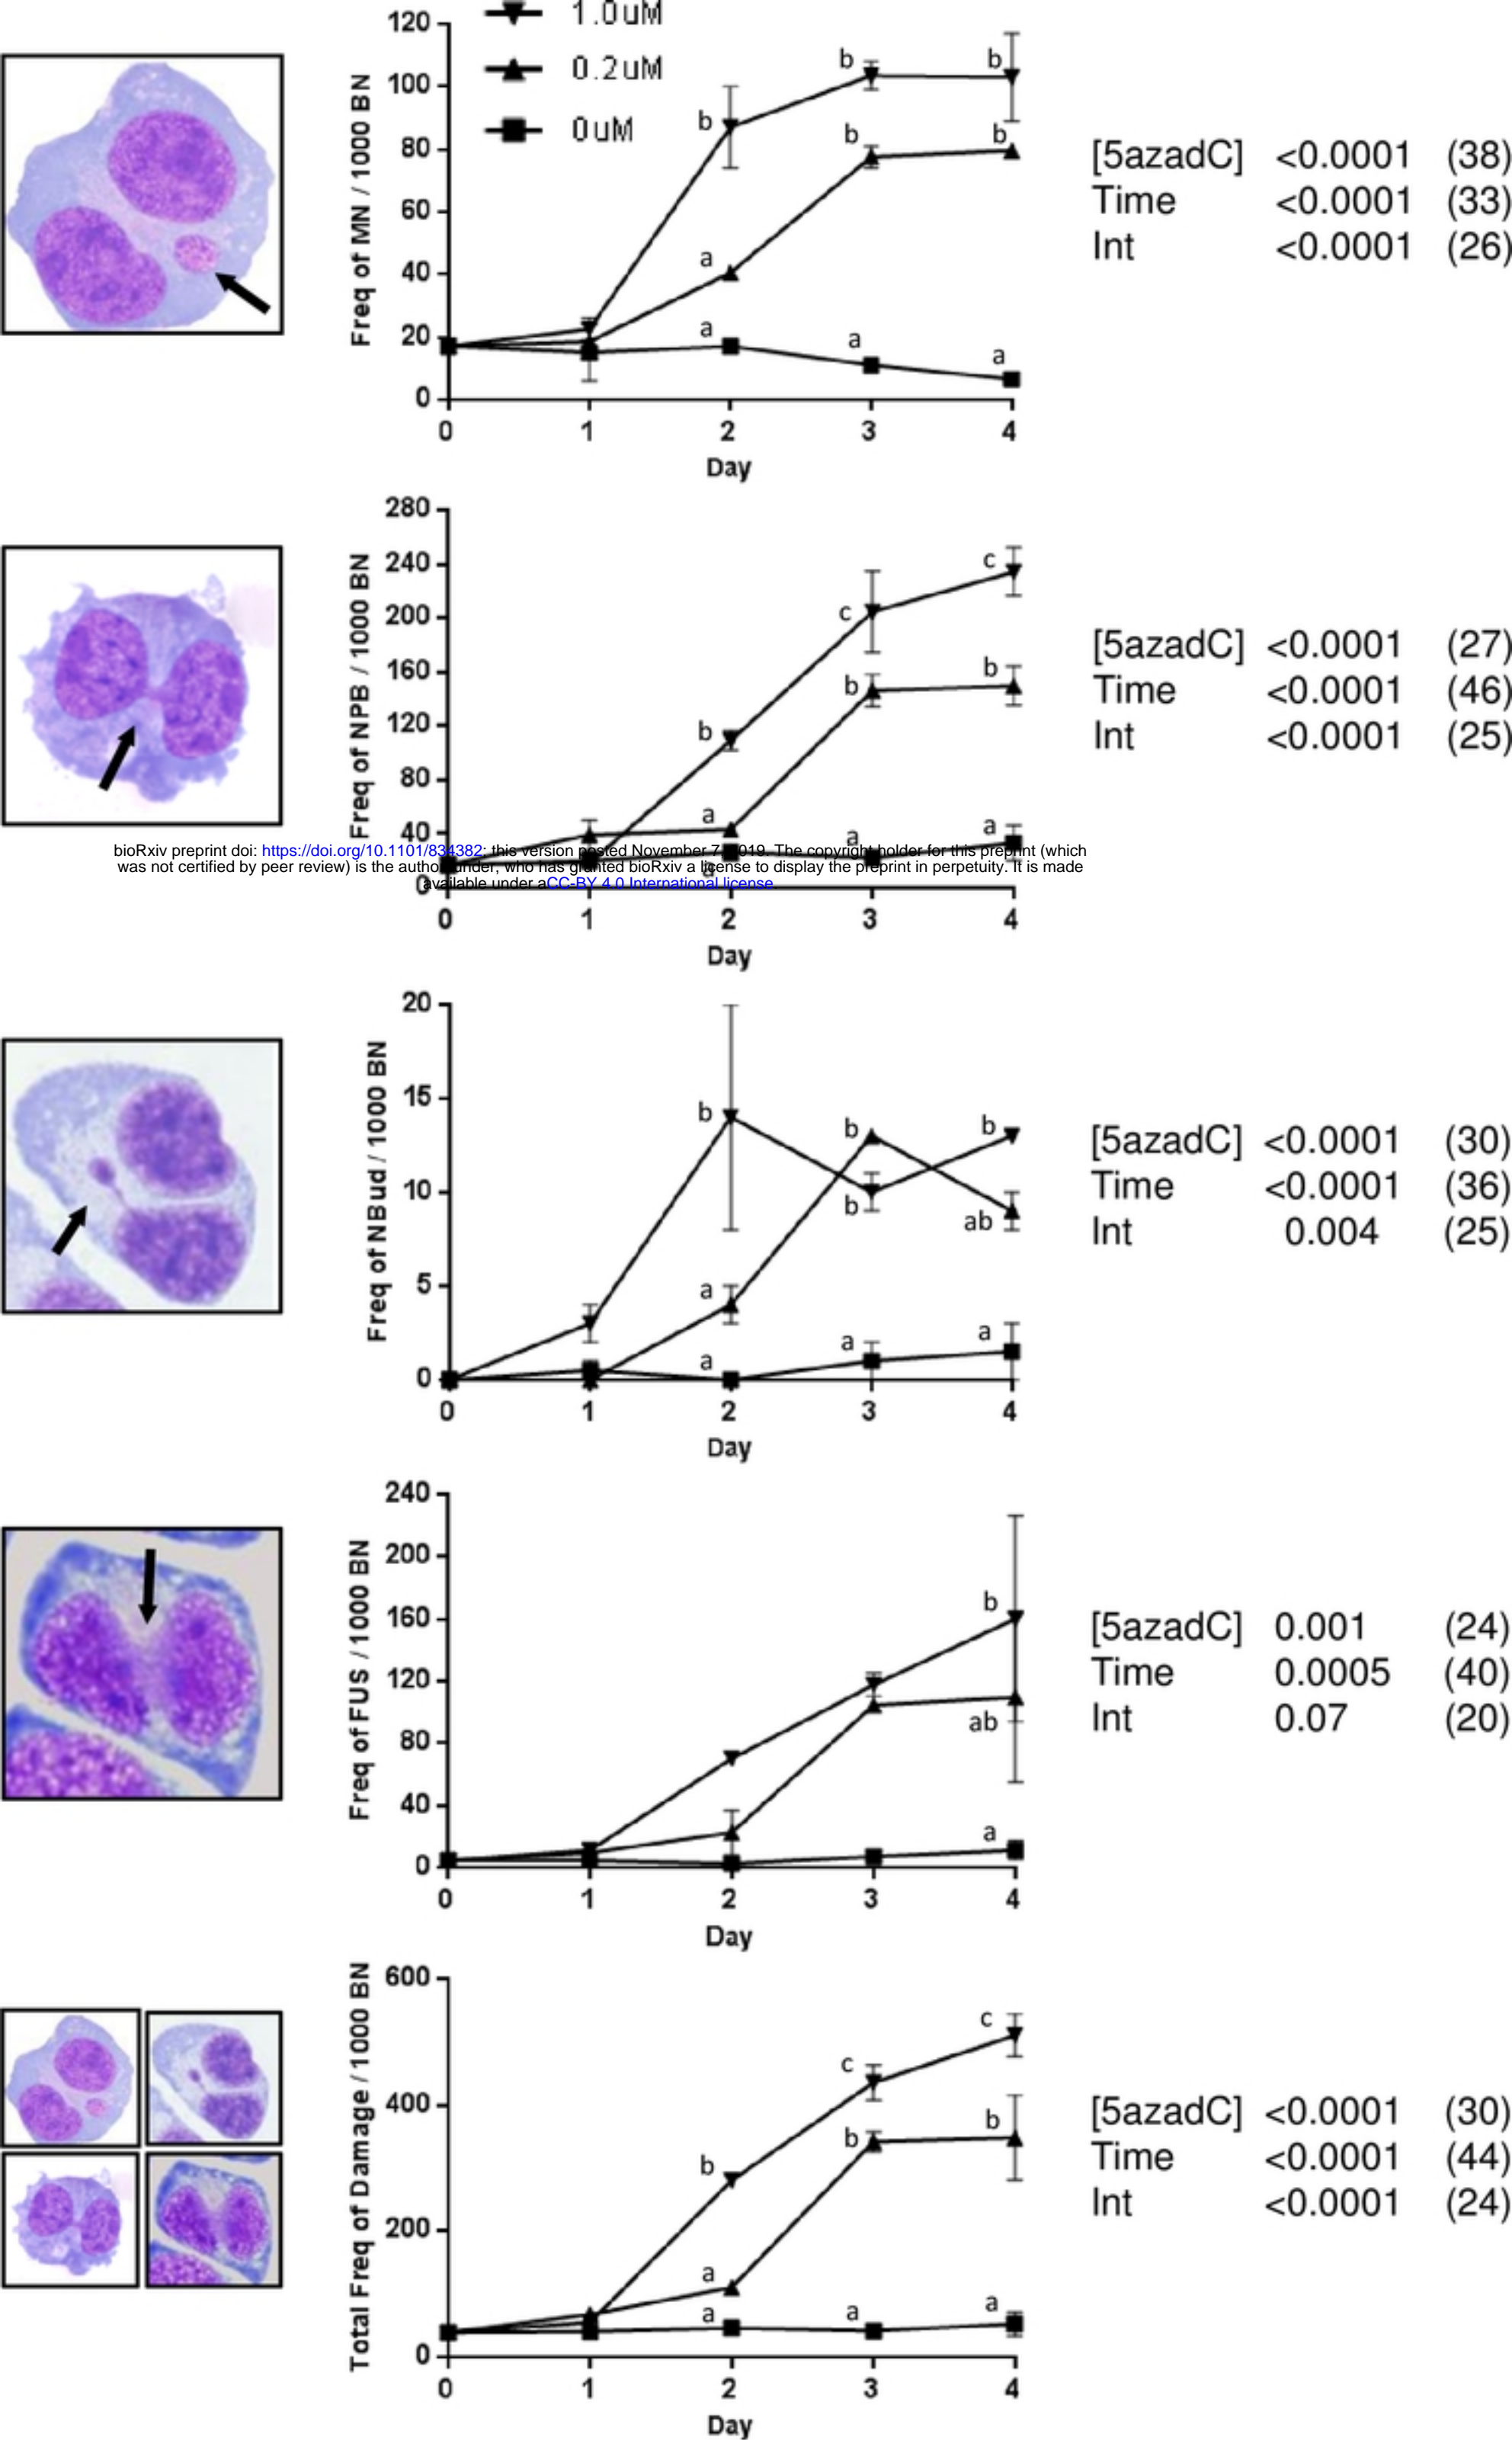

Figure 3

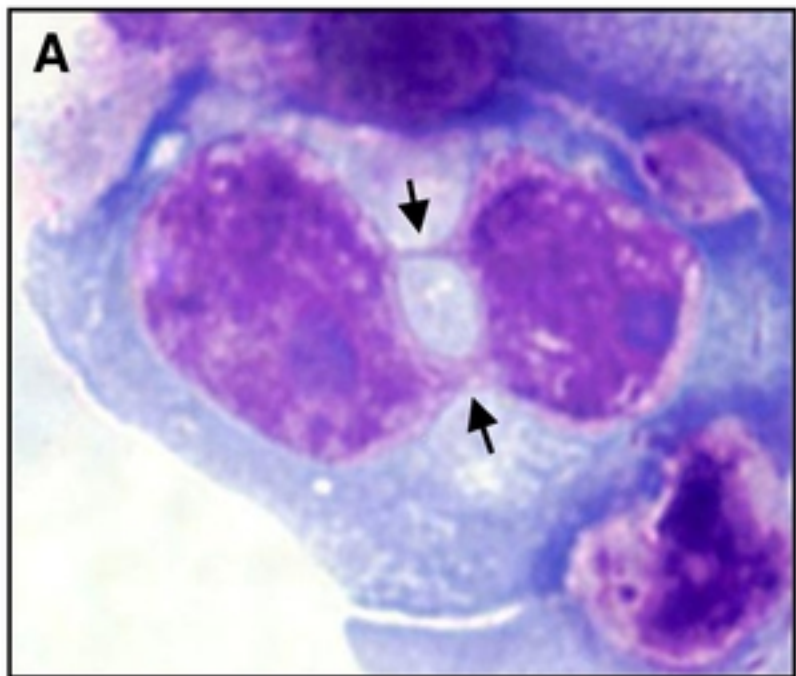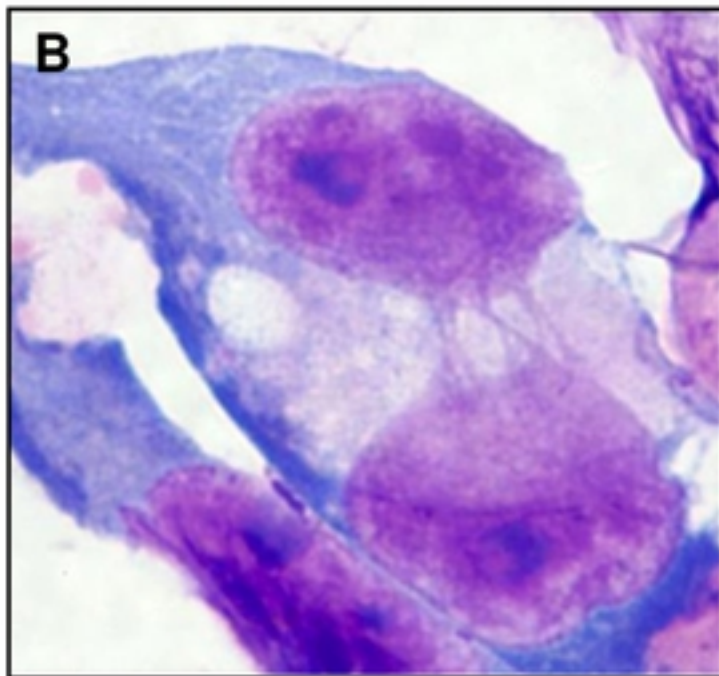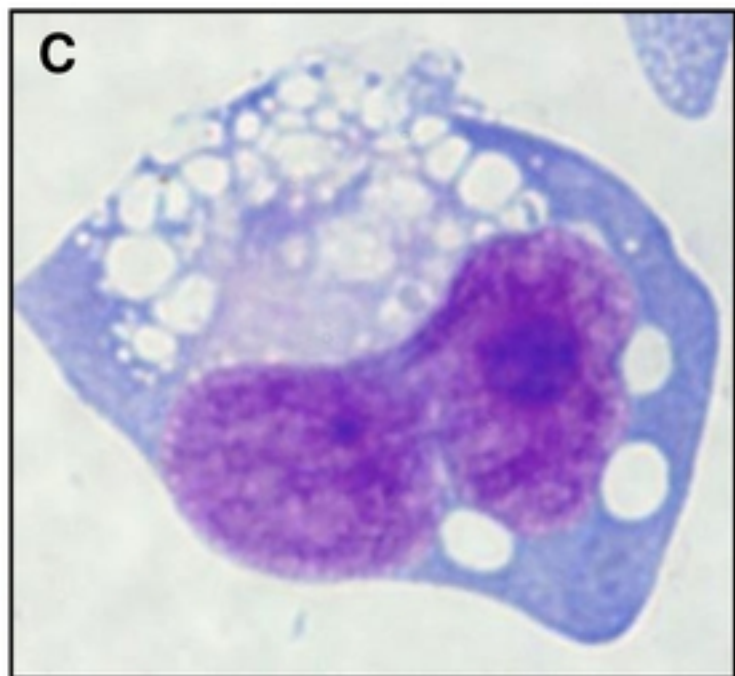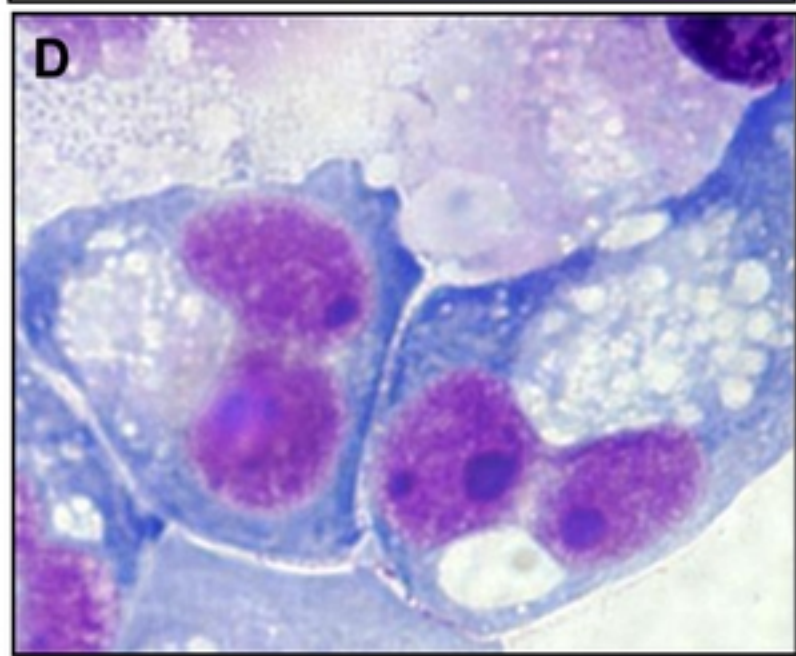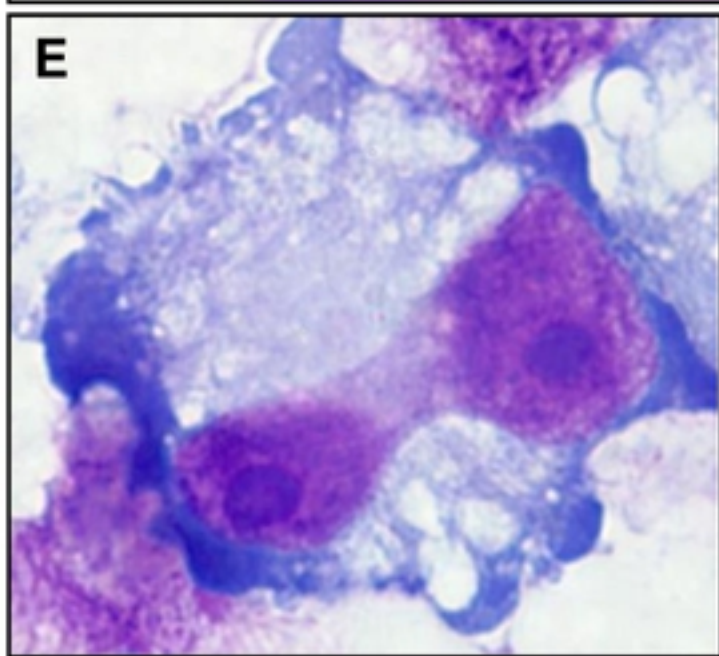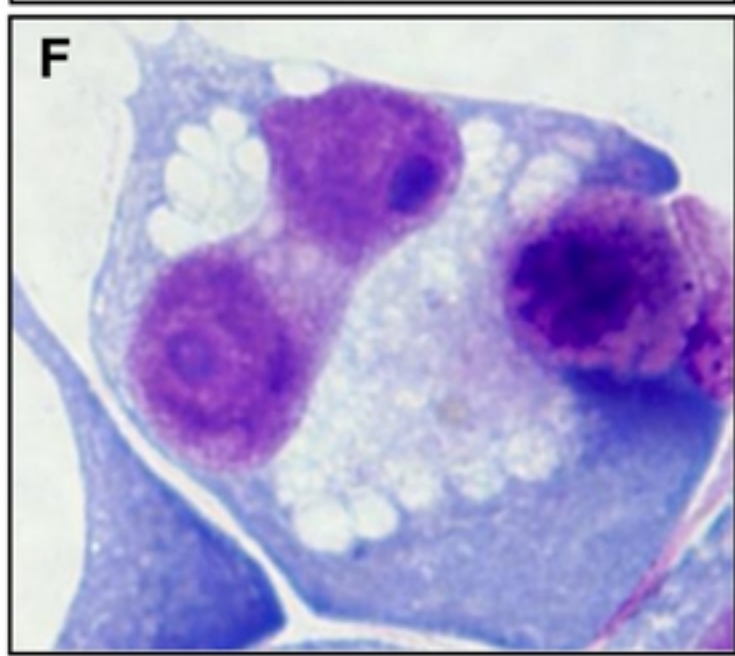

Figure 4
